# Supplementary material
Source: PubMed Central journal article supplement (PMC8254745)
Supplement: NIHMS1683941-supplement-1.pdf [file NIHMS1683941-supplement-1.pdf]

Supplemental Table 1. ICD-9 and ICD-10 diagnosis codes used to define diagnosis of female infertility.

| <b>Diagnosis</b>                                     | <b>ICD-9 Code</b> | <b>ICD-10 Code</b>   | <b>Comments</b>                                                                                                                                                                                                                                    |
|------------------------------------------------------|-------------------|----------------------|----------------------------------------------------------------------------------------------------------------------------------------------------------------------------------------------------------------------------------------------------|
| Female infertility                                   | 628.x             | N97.x                | Includes the following diagnoses: female infertility associated with anovulation, female infertility of pituitary-hypothalamic origin, tubal origin, uterine origin, cervical or vaginal origin, or female infertility of other unspecified origin |
| Female infertility due to tubal stenosis or blockage | 614.6             | N73.6                | Additional codes to capture tubal factor infertility                                                                                                                                                                                               |
| Female infertility due to male factor                | 606.9             | Z31.81, N46.9, N46.8 |                                                                                                                                                                                                                                                    |

Supplemental Table 2. Propensity matching on a subgroup of the infertile and non-infertile cohorts. Absolute incidence, events per person years, hazard ratios and 95% confidence intervals (CI) reported for the association between female infertility and mortality with cohorts matched based on age, follow up time, nulliparity, obesity, smoking, year of visit, region and race.

|                       |     |               | <b>Infertile</b> | <b>Non-Infertile</b> | <b>Crude HR (95% CI)</b> | <b>aHR* (95% CI)</b> |
|-----------------------|-----|---------------|------------------|----------------------|--------------------------|----------------------|
| <b>All</b>            |     | N             | 51,883           | 51,883               | 1.11 (0.87 - 1.41)       | 1.11 (0.87 - 1.41)   |
|                       |     | Deaths (N, %) | 126 (0.24)       | 140 (0.27)           |                          |                      |
| <b>Age (years)</b>    | <35 | N             | 28,798           | 28,798               | 1.31 (0.96 - 1.98)       | 1.30 (0.86 - 1.97)   |
|                       |     | Deaths        | 39 (0.14)        | 51 (0.18)            |                          |                      |
|                       | ≥35 | N             | 23,085           | 23,085               | 1.02 (0.76 - 1.37)       | 1.02 (0.76 - 1.37)   |
|                       |     | Deaths        | 87 (0.38)        | 89 (0.39)            |                          |                      |
| <b>MetS Diagnoses</b> | 0   | N             |                  |                      | 1.22 (0.89 - 1.68)       | 1.22 (0.89 - 1.68)   |
|                       |     | Deaths        | 41,072           | 40,808               |                          |                      |
|                       | ≥1  | N             | 69 (0.17)        | 85 (0.21)            | 0.98 (0.68 - 1.41)       | 0.83 (0.96 - 1.14)   |

|                               |          |        |           |           |                    |                    |
|-------------------------------|----------|--------|-----------|-----------|--------------------|--------------------|
|                               |          | Deaths | 10,811    | 11,075    | 1.42)              | 1.39)              |
| <b>CCI</b>                    | 0        | N      | 57 (0.51) | 55 (0.51) | 1.08 (0.77 - 1.50) | 1.09 (0.78 - 1.51) |
|                               |          | Deaths |           |           |                    |                    |
|                               | ≥1       | N      | 41,509    | 41,662    | 1.09 (0.77 - 1.54) | 1.03 (0.73 - 1.46) |
|                               |          | Deaths | 68 (0.16) | 72 (0.17) |                    |                    |
| <b>Follow-up time (years)</b> | <4       | N      | 10,374    | 10,221    | 1.21 (0.90 - 1.63) | 1.21 (0.89 - 1.64) |
|                               |          | Deaths | 58 (0.57) | 68 (0.66) |                    |                    |
|                               | ≥4       | N      |           |           | 1.02 (0.67 - 1.55) | 1.02 (0.68 - 1.55) |
|                               |          | Deaths | 35,103    | 35,032    |                    |                    |
| <b>Race</b>                   | Asian    | N      | 82 (0.23) | 95 (0.27) | 1.50 (0.25 - 8.98) | 1.46 (0.24 - 8.75) |
|                               |          | Deaths | 16,780    | 16,851    |                    |                    |
|                               | Black    | N      | 44 (0.26) | 45 (0.27) | 1.47 (0.80 - 2.73) | 1.47 (0.80 - 2.73) |
|                               |          | Deaths |           |           |                    |                    |
|                               | Hispanic | N      | 3,927     | 3,927     | 0.70 (0.27 - 1.85) | 0.66 (0.25 - 1.74) |
|                               |          | Deaths | <11       | <11       |                    |                    |
|                               | White    | N      | 4,281     | 4,281     | 1.09 (0.82 - 1.44) | 1.08 (0.81 - 1.43) |
|                               |          | Deaths | 17 (0.40) | 25 (0.58) |                    |                    |

\*Adjusted for age, year of evaluation, smoking, number of visits per year, nulliparity, obesity, region of country and race.

MetS Diagnoses=Metabolic syndrome diagnoses: hypertension, hyperlipidemia, type II diabetes, and obesity

CCI=Charlson Comorbidity Index
